# Supplementary material for: Sub 10 nm CoO nanoparticle-decorated graphitic carbon nitride for solar hydrogen generationviaefficient charge separation
Source: Royal Society of Chemistry journal article supplement (doi:10.1039/d0na00508h), 2020-01-01
Supplement: d0na00508h1.pdf [file d0na00508h1.pdf]

## Electronic Supplementary Material

### Sub 10 nm CoO nanoparticles decorated graphitic carbon nitride Type II heterojunction for solar hydrogen generation

Aniruddha Mondal,<sup>a</sup> Shubham Biswas,<sup>b</sup> Srishti,<sup>b</sup> Aditya Kumar,<sup>b</sup> Jong-Sung Yu<sup>\*,c,d</sup> Apurba  
Sinhamahapatra<sup>\*,b</sup>

<sup>a</sup>: *Department of Chemical Engineering and Biotechnology, Tatung University, No. 40, Sec., 3,  
Chungshan North Rd., Taipei City 104, Taiwan*

<sup>b</sup>: *Department of Chemical Engineering, Indian Institute of Technology (ISM), Dhanbad,  
Dhanbad-826004, Jharkhand, India.*

<sup>c</sup>: *Department of Energy Science and Engineering, DGIST, Daegu, 42988, Republic of Korea*

<sup>d</sup>: *Department of Materials Science and Engineering, National Taiwan University of Science  
and Technology, Taipei 10607, Taiwan*

Corresponding author. E-mail address: [apurba@iitism.ac.in](mailto:apurba@iitism.ac.in) (AS), [jsyu@dgist.ac.kr](mailto:jsyu@dgist.ac.kr) (JSYU).

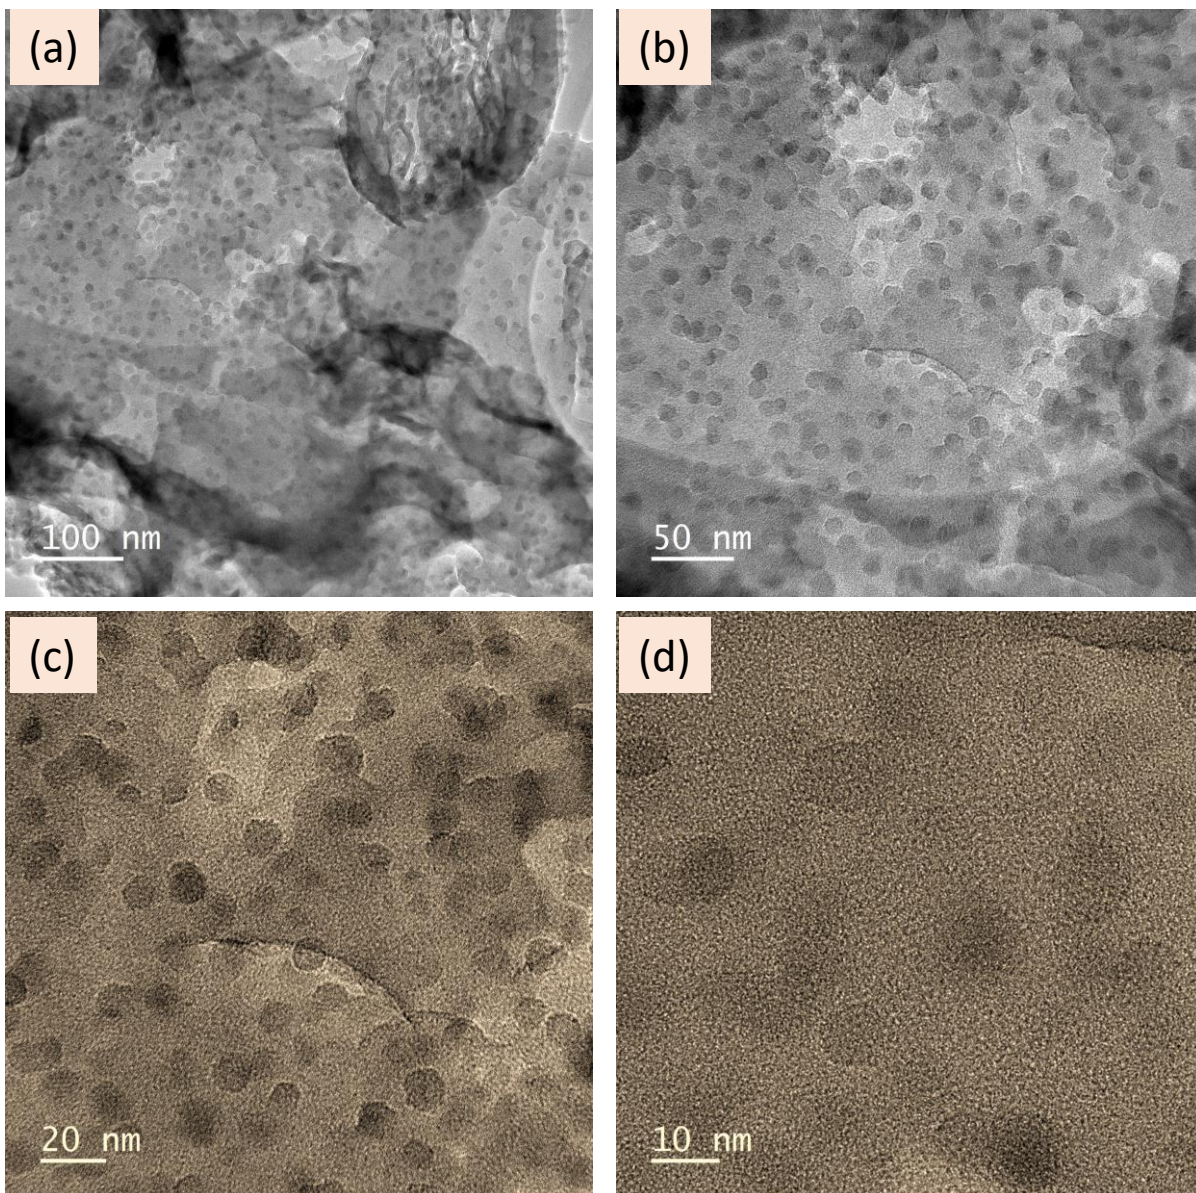

**Fig. S1** HR-TEM images of CoO/GCN

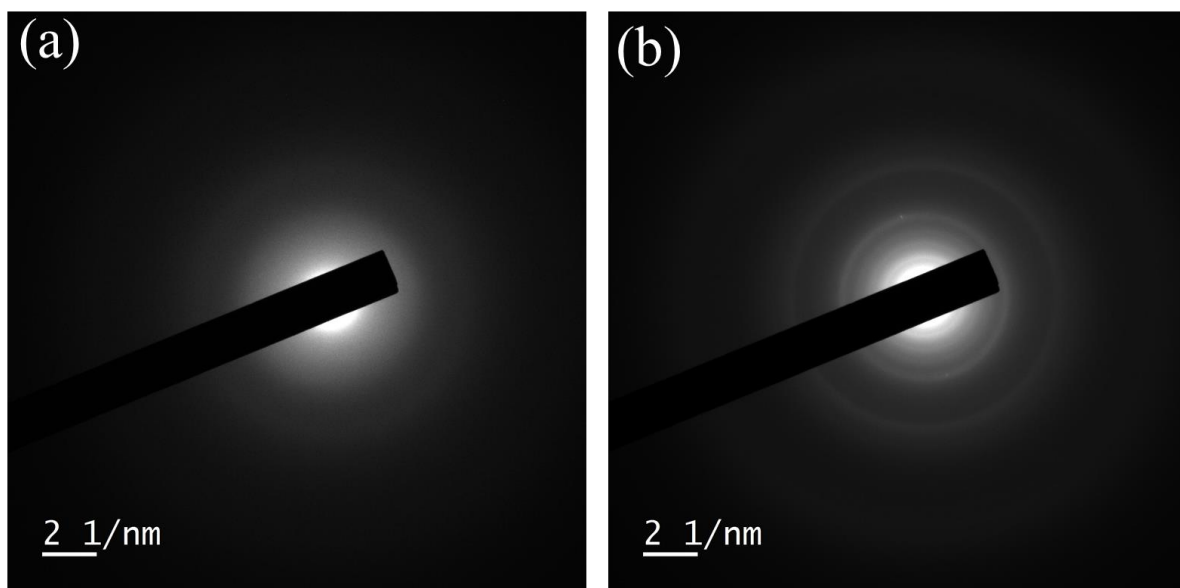

**Fig. S2** SAED patterns of (a) GCN and (b) CoO-GCN-x.

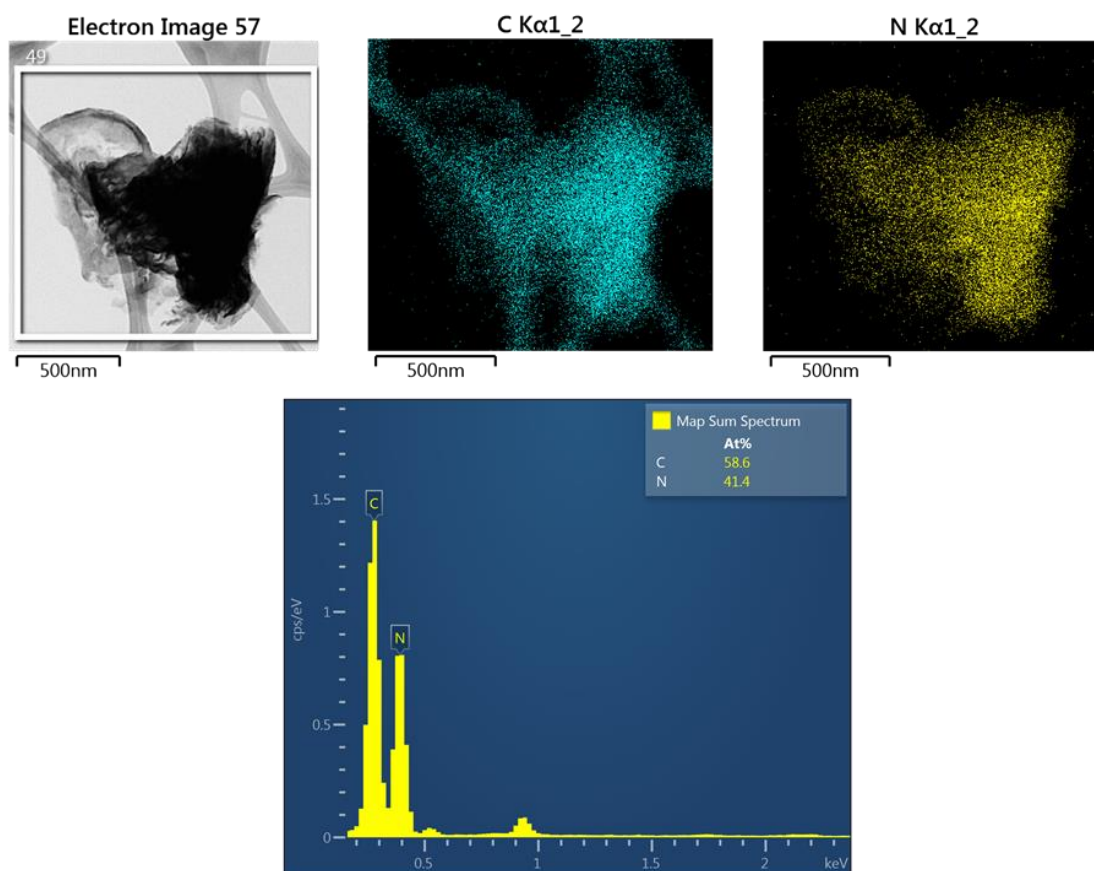

**Fig. S3** Elemental mapping and EDS of as-prepared GCN.

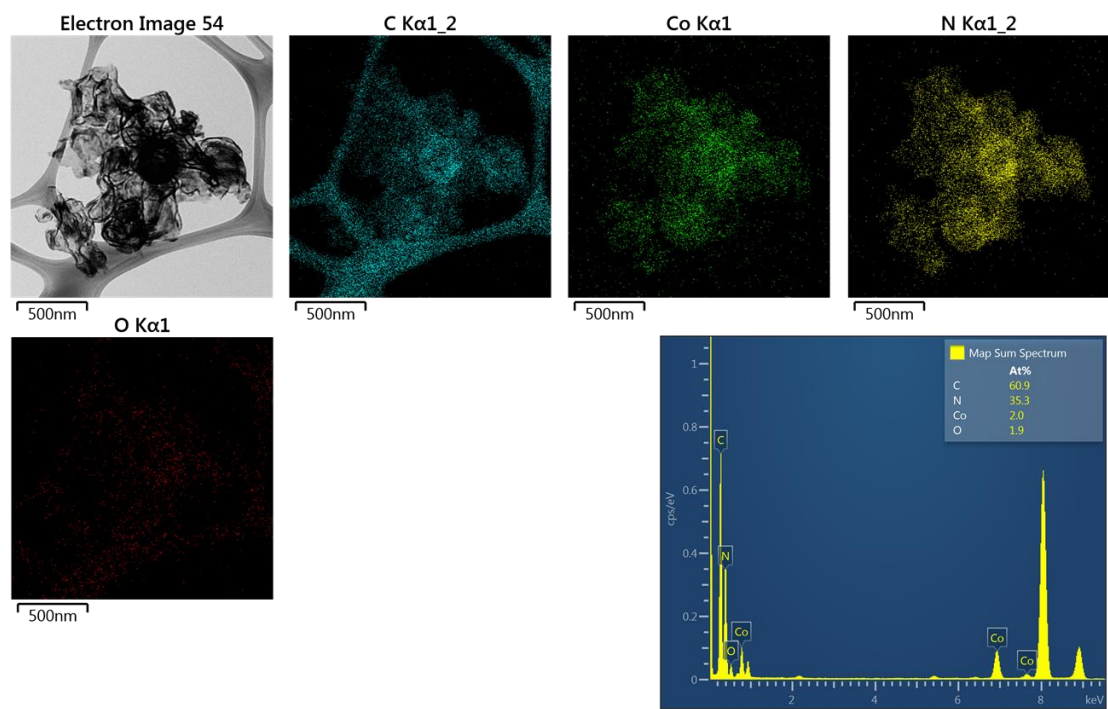

**Fig. S4** Elemental mapping and EDS of CoO-GCN-x.

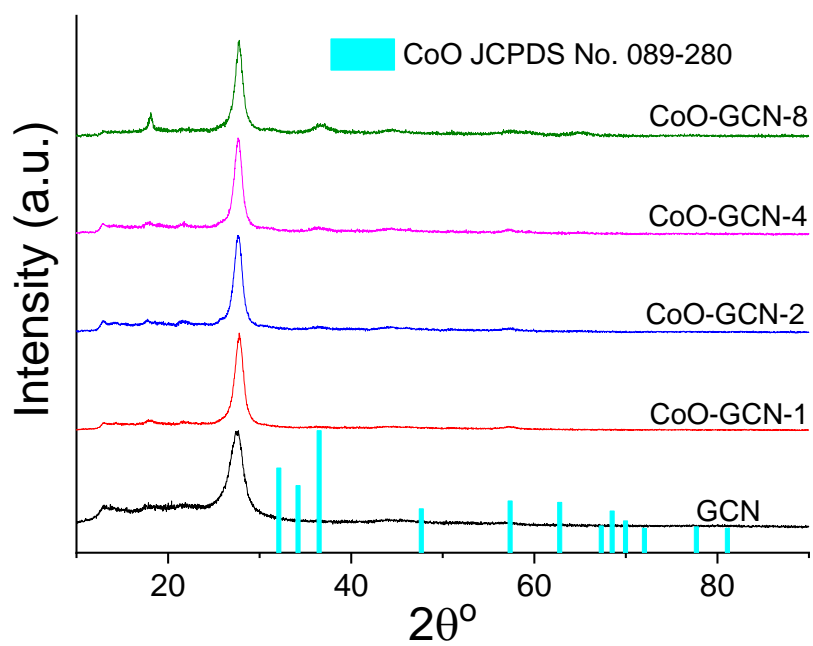

**Fig. S5** Powder XRD pattern of GCN and CoO-GCN-x samples.

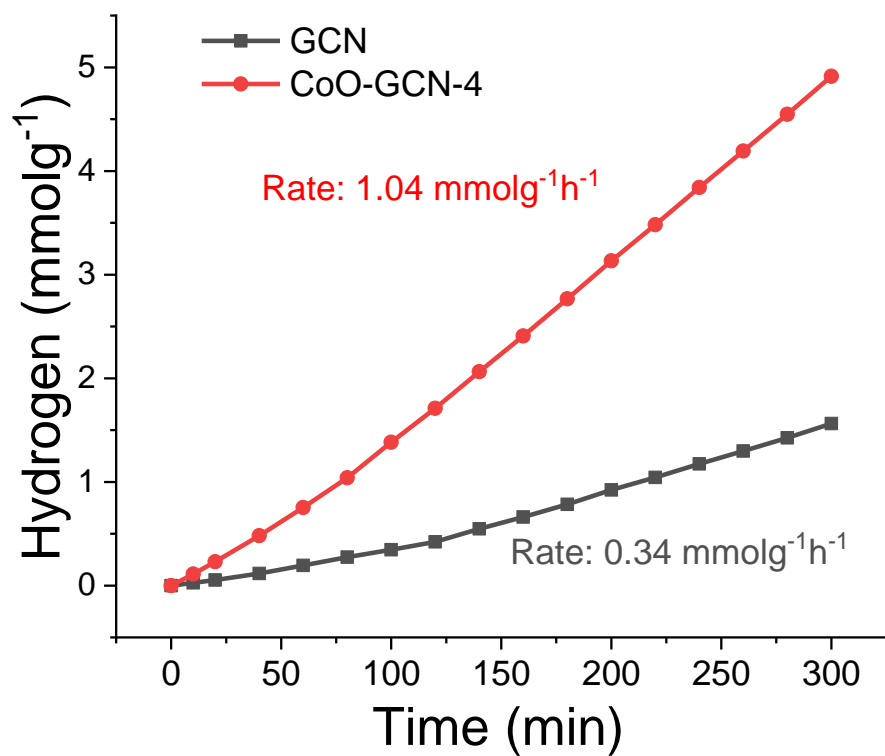

**Fig. S6** Continuous hydrogen generation profile of bare GCN and CoO/GCN-4 without using Pt co-catalyst under simulated sunlight.

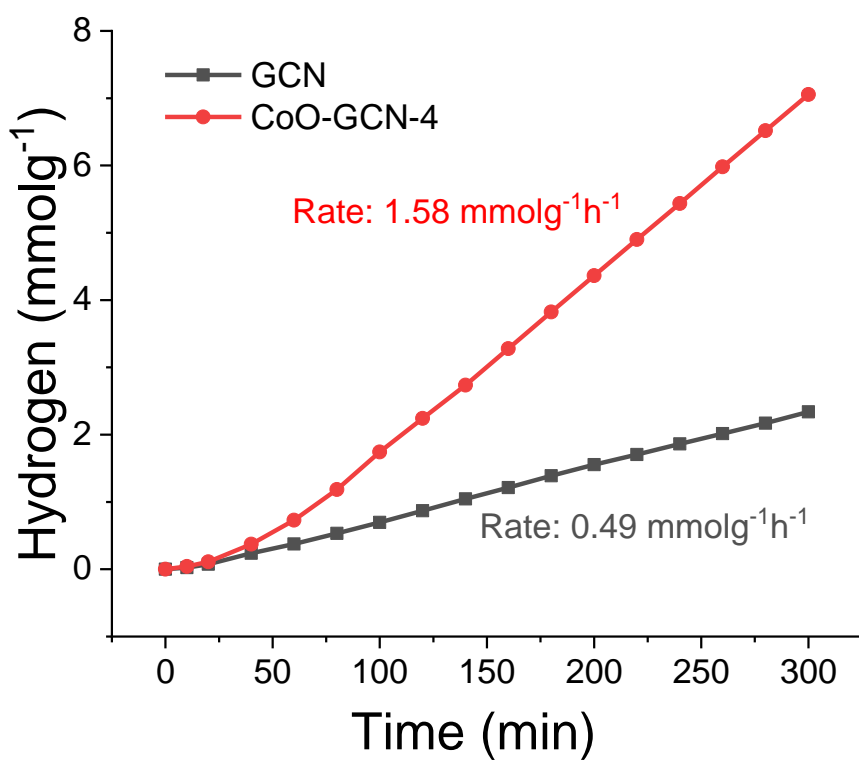

**Fig. S7** Continuous hydrogen generation profile of bare GCN and CoO/GCN-4 under only visible ( $\lambda > 395$  nm) light in the presence of Pt co-catalyst.



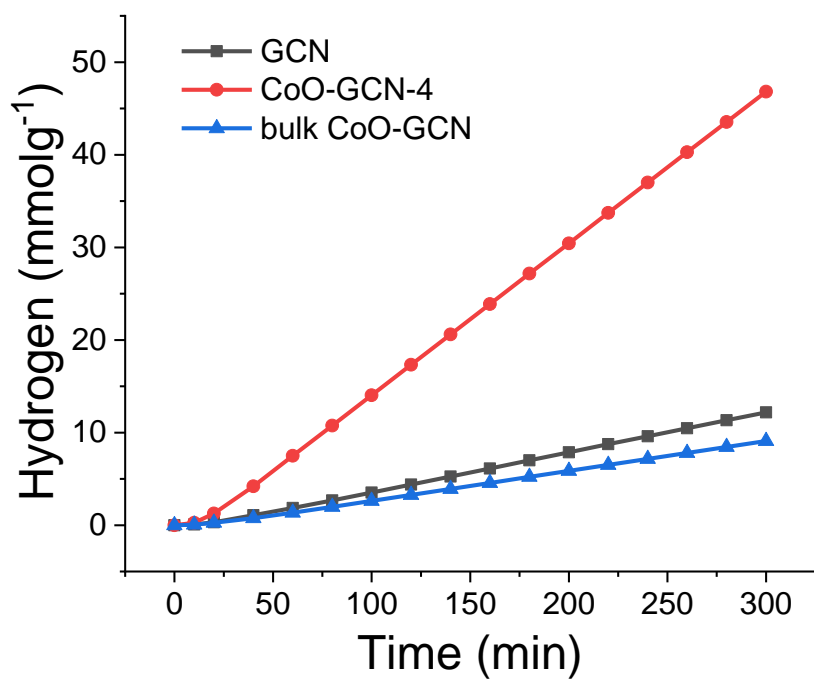

**Fig. S8** Continuous hydrogen generation profile of bare GCN and CoO/GCN-4 and bulk CoO/GCN. Bulk CoO was prepared via pyrolysis of cobalt acetate to Co<sub>3</sub>O<sub>4</sub> to CoO.

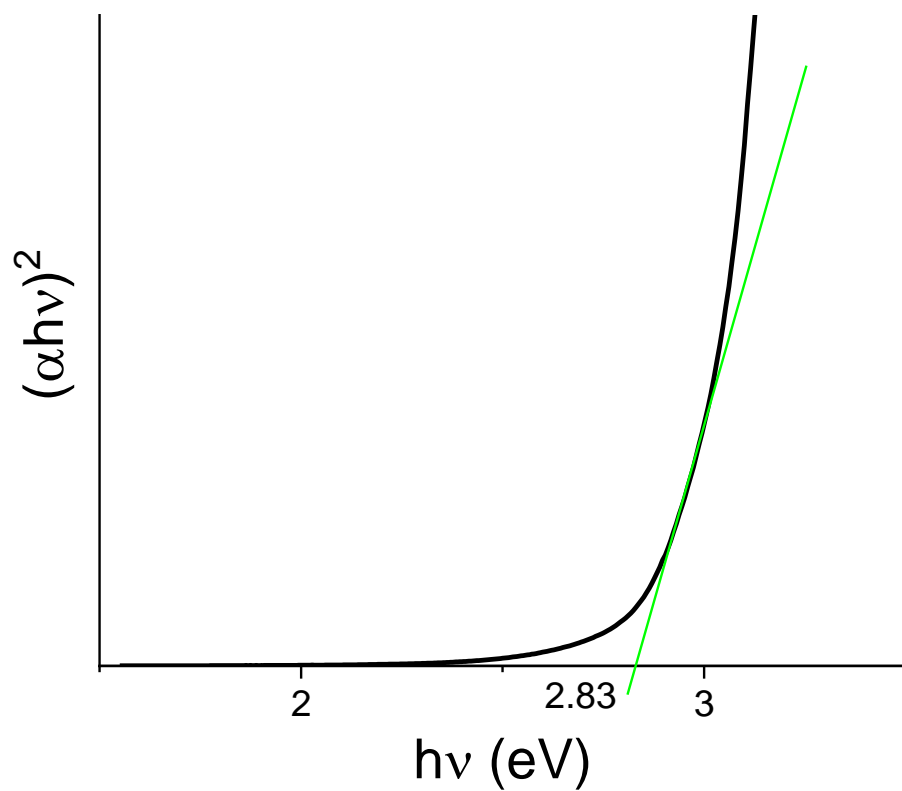

**Fig. S9** Tauc plot calculated from the DRS data for GCN

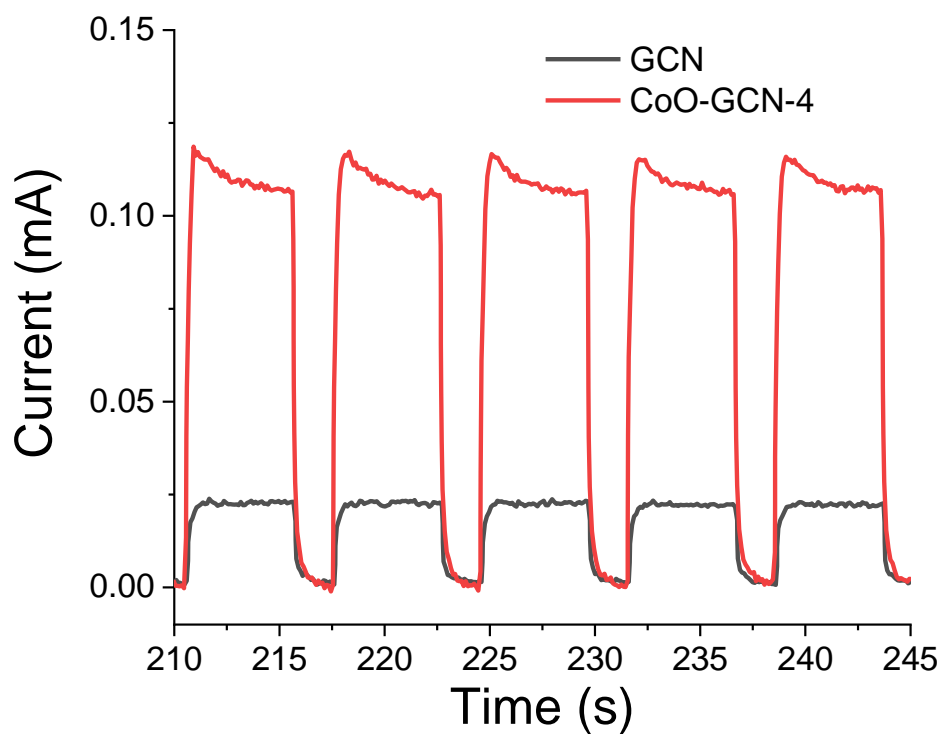

**Fig. S10** Photocurrent response under simulated sunlight (1 sun) measured in  $\text{Na}_2\text{SO}_4$  (0.5 M) as the electrolyte using Biologic VMP3 electrochemical workstation. A slurry containing 5.0 mg of catalyst, 0.1 ml of 5 wt % Nafion and 0.9 ml of water was prepared and coated on FTO glass for the current measurement.
